# Supplementary material for: Dissociating the neural correlates of tactile temporal order and simultaneity judgements
Source: PubMed Central journal article supplement (PMC4827393; doi:10.1038/srep23323), 2016-04-11
Supplement: srep23323-s1.pdf [file srep23323-s1.pdf]

## Supplementary information

# Dissociating the neural correlates of tactile temporal order and simultaneity judgements

Makoto Miyazaki<sup>1,2\*</sup>, Hiroshi Kadota<sup>2</sup>, Kozue S Matsuzaki<sup>2</sup>, Shigeki Takeuchi<sup>3</sup>,  
Hirofumi Sekiguchi<sup>3</sup>, Takuo Aoyama<sup>4</sup>, Takanori Kochiyama<sup>5</sup>

1. Department of Computer Science, Faculty of Informatics, Shizuoka University
2. Research Institute, Kochi University of Technology
3. Faculty of Business and Information Sciences, Jobu University
4. Research Institute for Time Studies, Yamaguchi University
5. ATR Brain Activity Imaging Center

**\*Corresponding author:**

Makoto Miyazaki, Faculty of Informatics, Shizuoka University, 3-5-1 Johoku, Naka-ku,  
Hamamatsu, Shizuoka 432-8011, Japan

< miyazaki-makoto@inf.shizuoka.ac.jp >

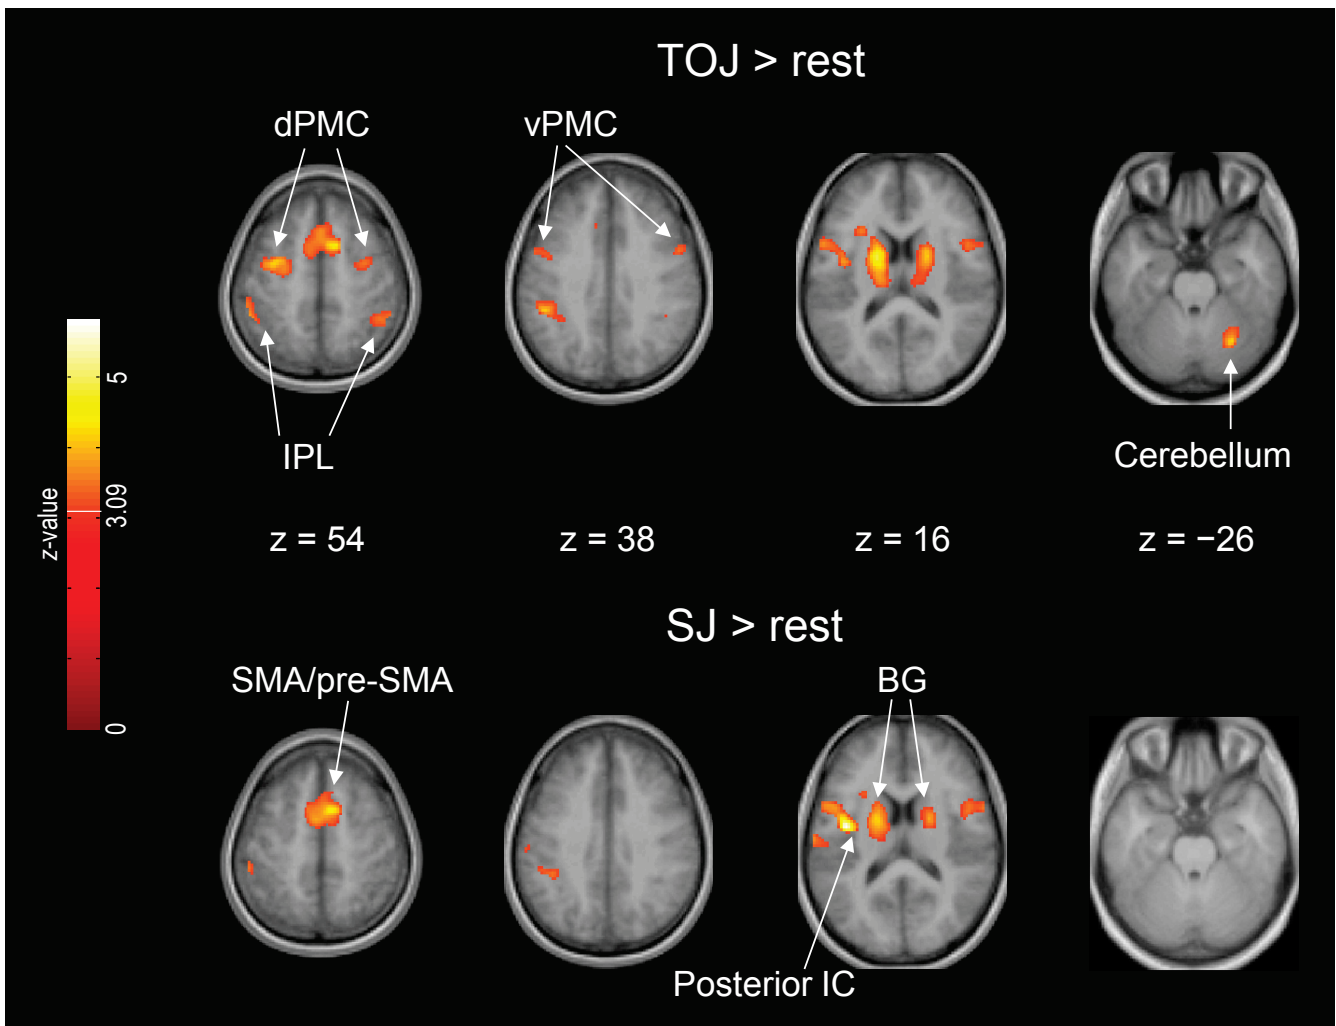

**Figure S1.** Brain regions that were more strongly activated during TOJ and SJ than during the baseline resting periods. The results are from a 16-participant group analysis. Significantly activated voxels were identified using a significance threshold of  $P < 0.001$  uncorrected at the voxel level ( $Z = 3.09$ ) and  $P < 0.05$  FWE-corrected at the cluster level. dPMC, dorsal premotor cortex; vPMC, ventral premotor cortex; IPL, inferior parietal lobule; SMA, supplementary motor area; IC, insular cortex; BG, basal ganglia.

**Table S1.** Regions exhibiting greater activity during TOJ than during SJ. The activated voxels were identified using a significance threshold of  $P < 0.001$  uncorrected at the voxel level ( $Z = 3.09$ ) and  $P < 0.05$  FWE-corrected at the cluster level. The clusters shown underneath the dashed line were detected using the liberal threshold at the cluster level ( $P < 0.05$  uncorrected) without changing the threshold at the voxel level ( $P < 0.001$  uncorrected). In this contrast, the  $\sigma$  difference between tasks was modelled as a covariate of no interest, and the voxels that correlated with the  $\sigma$  difference ( $P < 0.05$  uncorrected at the voxel level) were exclusively masked. This contrast was also inclusively masked with the TOJ > rest contrast ( $P < 0.05$  uncorrected at the voxel level).

| Cluster# | Size (voxel) | z-score | L/R | Region                                           | BA    | MNI Coordinates |     |     |
|----------|--------------|---------|-----|--------------------------------------------------|-------|-----------------|-----|-----|
|          |              |         |     |                                                  |       | x               | y   | z   |
| 1        | 540          | 4.84    | L   | Precentral Gyrus                                 | 6     | -32             | -4  | 54  |
|          |              | 4.81    | L   | Precentral Gyrus                                 | 6     | -32             | -2  | 58  |
|          |              | 4.34    | L   | Cingulate Gyrus/Middle Frontal Gyrus             | 6     | -24             | -16 | 46  |
|          |              | 4.33    | L   | Precentral Gyrus/Superior Frontal Gyrus          | 6     | -24             | -10 | 54  |
| 2        | 221          | 4.80    | L   | Precentral Gyrus                                 | 6     | -48             | 2   | 36  |
| 3        | 199          | 4.31    | R   | Middle Frontal Gyrus                             | 6     | 28              | -4  | 54  |
|          |              | 4.04    | R   | Medial Frontal Gyrus/Middle Frontal Gyrus        | 6     | 22              | -8  | 50  |
| 4        | 529          | 4.25    | L   | Superior Parietal Lobule                         | 7     | -30             | -62 | 48  |
|          |              | 4.00    | L   | Superior Parietal Lobule                         | 7     | -30             | -64 | 58  |
|          |              | 3.89    | L   | Superior Temporal Gyrus/Inferior Parietal Lobule | 39/40 | -30             | -52 | 40  |
|          |              | 3.84    | L   | Inferior Parietal Lobule                         | 7     | -34             | -54 | 50  |
|          |              | 3.43    | L   | Inferior Parietal Lobule                         | 40    | -44             | -50 | 56  |
|          |              | 3.36    | L   | Inferior Parietal Lobule                         | 40    | -46             | -46 | 50  |
|          |              | 3.26    | L   | Inferior Parietal Lobule                         | 40    | -48             | -42 | 40  |
| 5        | 240          | 3.89    | R   | Thalamus                                         |       | 10              | -12 | 0   |
|          |              | 3.84    | R   | Thalamus/Subthalamic Nucleus                     |       | 8               | -14 | -6  |
|          |              | 3.80    | R   | Thalamus                                         |       | 12              | -8  | 2   |
|          |              | 3.65    | R   | Thalamus                                         |       | 2               | -12 | 4   |
|          |              | 3.60    | L   | Thalamus                                         |       | -6              | -12 | -2  |
|          |              | 3.58    | L   | Thalamus                                         |       | -6              | -14 | 2   |
|          |              | 3.36    | L   | Thalamus                                         |       | -10             | -6  | 6   |
| 6        | 140          | 3.90    | R   | Cerebellum                                       |       | 32              | -68 | -28 |
|          |              | 3.87    | R   | Cerebellum                                       |       | 28              | -60 | -32 |
|          |              | 3.61    | R   | Cerebellum                                       |       | 36              | -62 | -32 |
| 7        | 171          | 3.81    | L   | Insula                                           | 13    | -34             | 28  | 6   |
|          |              | 3.71    | L   | Insula                                           | 13    | -34             | 24  | 8   |
|          |              | 3.63    | L   | Clastrum                                         |       | -28             | 20  | 8   |
| 8        | 86           | 3.61    | L   | Clastrum                                         |       | -32             | 14  | 0   |
|          |              | 3.80    | R   | Cerebellum                                       |       | 26              | -68 | -48 |
|          |              | 3.76    | R   | Cerebellum                                       |       | 22              | -66 | -48 |
| 9        | 104          | 3.65    | R   | Cerebellum                                       |       | 26              | -60 | -44 |
|          |              | 3.72    | R   | Medial Frontal Gyrus/Superior Frontal Gyrus      | 6     | 12              | 8   | 58  |
|          |              | 3.49    | L   | Medial Frontal Gyrus/Superior Frontal Gyrus      | 6     | -8              | 12  | 52  |
|          |              | 3.37    | L   | Superior Frontal Gyrus                           | 6     | -2              | 14  | 54  |

**Table S2.** Regions exhibiting greater activity during SJ than during TOJ. The activated voxels were identified using a significance threshold of  $P < 0.001$  uncorrected at the voxel level ( $Z = 3.09$ ) and  $P < 0.05$  FWE-corrected at the cluster level. The clusters shown underneath the dashed line were detected using the liberal extent threshold at the cluster level ( $P < 0.05$  uncorrected) without changing the threshold at the voxel level ( $P < 0.001$  uncorrected). In this contrast, the  $\sigma$  difference between tasks was modelled as a covariate of no interest, and the voxels that correlated with the  $\sigma$  difference ( $P < 0.05$  uncorrected at the voxel level) were exclusively masked. This contrast was also inclusively masked with the SJ > rest contrast ( $P < 0.05$  uncorrected at the voxel level).

| Cluster# | Size (voxel) | z-score | L/R | Region                         | BA    | MNI Coordinates |     |    |
|----------|--------------|---------|-----|--------------------------------|-------|-----------------|-----|----|
|          |              |         |     |                                |       | x               | y   | z  |
| 1        | 259          | 4.03    | L   | Insula                         | 13    | -42             | 0   | 8  |
|          |              | 4.01    | L   | Superior Temporal Gyrus        | 22    | -48             | 2   | -2 |
|          |              | 3.98    | L   | Insula                         | 13    | -46             | -2  | 4  |
|          |              | 3.92    | L   | Insula/Rolandic Operculum      | 13    | -48             | -6  | 8  |
|          |              | 3.89    | L   | Insula                         | 13    | -40             | -10 | 18 |
| 2        | 120          | 3.62    | R   | Insula                         | 13    | 44              | -2  | 10 |
|          |              | 3.60    | R   | Insula/Superior Temporal Gyrus | 13/22 | 48              | 2   | 4  |
|          |              | 3.51    | R   | Insula                         | 13    | 40              | 2   | 12 |
|          |              | 3.47    | R   | Insula                         | 13    | 40              | -4  | 18 |
|          |              | 3.38    | R   | Insula                         | 13    | 40              | 0   | 0  |

**Table S3.** Regions exhibiting greater activity during TOJ than during the baseline resting periods. The activated voxels were identified using a significance threshold of  $P < 0.001$  uncorrected at the voxel level ( $Z = 3.09$ ) and  $P < 0.05$  FWE-corrected at the cluster level.

| Cluster# | Size (voxel) | z-score                | L/R  | Region                                      | BA   | MNI Coordinates |     |     |
|----------|--------------|------------------------|------|---------------------------------------------|------|-----------------|-----|-----|
|          |              |                        |      |                                             |      | x               | y   | z   |
| 1        | 1293         | 5.51                   | R    | Medial Frontal Gyrus/Superior Frontal Gyrus | 6    | 10              | 6   | 60  |
|          |              | 4.81                   | L    | Medial Frontal Gyrus                        | 6    | -10             | 10  | 50  |
|          |              | 4.49                   | L    | Medial Frontal Gyrus                        | 6    | -8              | -2  | 60  |
|          |              | 4.11                   | L    | Medial Frontal Gyrus/Superior Medial Gyrus  | 32   | -8              | 20  | 42  |
|          |              | 4.04                   |      | Superior Frontal Gyrus                      | 6/8  | 0               | 16  | 54  |
|          |              | 3.80                   | R    | Superior Frontal Gyrus                      | 32   | 8               | 22  | 48  |
| 2        | 5745         | 5.45                   | L    | Clastrum                                    |      | -30             | 20  | 2   |
|          |              | 5.21                   | L    | Caudate/Putamen                             |      | -18             | 0   | 16  |
|          |              | 5.07                   | L    | Thalamus                                    |      | -12             | -12 | 2   |
|          |              | 5.05                   | L    | Thalamus                                    |      | -14             | -12 | 8   |
|          |              | 5.03                   | L    | Caudate                                     |      | -14             | 6   | 8   |
|          |              | 5.02                   | R    | Insula                                      |      | 34              | 20  | 2   |
|          |              | 4.93                   | R    | Thalamus                                    |      | 12              | 0   | 8   |
|          |              | 4.89                   | R    | Thalamus                                    |      | 12              | -16 | 4   |
|          |              | 4.89                   | L    | Thalamus                                    |      | -10             | -4  | 8   |
|          |              | 4.88                   | L    | Thalamus                                    |      | -10             | 0   | 6   |
|          |              | 4.82                   | L    | Putamen                                     |      | -26             | 2   | -2  |
|          |              | 4.73                   | L    | Insula                                      | 13   | -38             | 16  | 6   |
|          |              | 4.62                   | R    | Caudate/Putamen                             |      | 18              | 2   | 14  |
|          |              | 4.54                   | R    | Putamen                                     |      | 20              | 4   | 2   |
|          |              | 4.36                   | R    | Putamen                                     |      | 28              | 2   | -2  |
|          |              | 4.33                   | L    | Inferior Frontal Gyrus                      | 9/44 | -56             | 8   | 24  |
|          |              | 4.17                   | L    | Red Nucleus                                 |      | -2              | -26 | -2  |
|          |              | 4.16                   | L    | Precentral Gyrus                            | 6    | -48             | 0   | 34  |
| 4.10     | L            | Insula                 | 13   | -42                                         | -4   | 16              |     |     |
| 4.07     | R            | Red Nucleus            |      | 10                                          | -22  | -8              |     |     |
| 3.78     | R            | Inferior Frontal Gyrus | 9/44 | 50                                          | 8    | 16              |     |     |
| 3.76     | L            | Precentral Gyrus       | 44   | -54                                         | 12   | 4               |     |     |
| 3        | 453          | 4.61                   | L    | Precentral Gyrus                            | 6    | -34             | -6  | 54  |
|          |              | 4.60                   | R    | Cerebellum                                  |      | 28              | -64 | -26 |
| 4        | 290          | 4.46                   | R    | Cerebellum                                  |      | 32              | -56 | -30 |
|          |              | 3.50                   | R    | Cerebellum                                  |      | 38              | -44 | -34 |
|          |              | 4.51                   | L    | Inferior Parietal Lobule                    | 40   | -48             | -40 | 38  |
| 5        | 581          | 4.10                   | L    | Inferior Parietal Lobule                    | 40   | -52             | -44 | 54  |
|          |              | 3.89                   | L    | Inferior Parietal Lobule                    | 40   | -56             | -38 | 50  |
|          |              | 3.74                   | L    | Inferior Parietal Lobule                    | 40   | -46             | -50 | 56  |
|          |              | 3.66                   | L    | Inferior Parietal Lobule                    | 40   | -36             | -48 | 44  |
|          |              | 4.47                   | R    | Inferior Parietal Lobule                    | 40   | 42              | -46 | 48  |
| 6        | 422          | 4.21                   | R    | Inferior Parietal Lobule                    | 40   | 54              | -46 | 50  |
|          |              | 3.99                   | R    | Inferior Parietal Lobule                    | 40   | 48              | -48 | 56  |
|          |              | 3.82                   | R    | Inferior Parietal Lobule                    | 40   | 58              | -34 | 50  |
|          |              | 4.14                   | R    | Precentral Gyrus                            | 6    | 32              | -8  | 50  |
| 7        | 298          | 3.95                   | R    | Precentral Gyrus                            | 6    | 54              | 4   | 42  |
|          |              | 3.47                   | R    | Precentral Gyrus                            | 6    | 42              | -6  | 48  |

**Table S4.** Regions exhibiting greater activity during SJ than during the baseline resting periods. The activated voxels were identified using a significance threshold of  $P < 0.001$  uncorrected at the voxel level ( $Z = 3.09$ ) and  $P < 0.05$  FWE-corrected at the cluster level.

| Cluster# | Size (voxel) | z-score                  | L/R  | Region                                       | BA    | MNI Coordinates |     |    |
|----------|--------------|--------------------------|------|----------------------------------------------|-------|-----------------|-----|----|
|          |              |                          |      |                                              |       | x               | y   | z  |
| 1        | 2690         | 5.82                     | L    | Insula                                       | 13    | -42             | -6  | 16 |
|          |              | 4.99                     | L    | Clastrum                                     |       | -28             | 22  | 6  |
|          |              | 4.59                     | L    | Putamen                                      |       | -18             | 4   | 10 |
|          |              | 4.58                     | L    | Putamen                                      |       | -18             | 8   | 4  |
|          |              | 4.57                     | L    | Caudate/Putamen                              |       | -18             | -2  | 16 |
|          |              | 4.44                     | L    | Putamen                                      |       | -26             | 0   | -2 |
|          |              | 4.44                     | L    | Putamen                                      |       | -24             | 0   | 2  |
|          |              | 4.25                     | L    | Inferior Frontal Gyrus                       | 44    | -50             | 8   | 20 |
|          |              | 4.19                     | L    | Inferior Frontal Gyrus                       | 9/44  | -54             | 8   | 24 |
|          |              | 4.10                     | L    | Insula                                       | 13    | -40             | 16  | 8  |
|          |              | 4.09                     | L    | Inferior Frontal Gyrus                       | 44    | -56             | 8   | 12 |
|          |              | 3.89                     | L    | Thalamus                                     |       | -12             | -20 | 8  |
|          |              | 3.53                     | L    | Thalamus/Subthalamic Nucleus                 |       | -14             | -16 | -4 |
| 2        | 1132         | 5.09                     | R    | Medial Frontal Gyrus/Superior Frontal Gyrus  | 6     | 6               | 6   | 58 |
|          |              | 5.07                     | L    | Medial Frontal Gyrus                         | 6     | -6              | -2  | 60 |
|          |              | 4.63                     | L    | Medial Frontal Gyrus                         | 6     | -8              | 8   | 50 |
|          |              | 4.12                     | R    | Medial Frontal Gyrus                         | 6     | 10              | -4  | 62 |
|          |              | 4.07                     | R    | Superior Frontal Gyrus                       | 6     | 14              | 0   | 74 |
| 3        | 1482         | 4.57                     | R    | Pallidum                                     |       | 14              | 4   | 2  |
|          |              | 4.40                     | R    | Putamen                                      |       | 20              | 4   | 2  |
|          |              | 4.36                     | R    | Caudate/Putamen                              |       | 20              | 0   | 14 |
|          |              | 4.31                     | R    | Insula                                       | 13    | 32              | 20  | 8  |
|          |              | 4.03                     | R    | Inferior Frontal Gyrus                       | 9/44  | 60              | 8   | 20 |
|          |              | 3.82                     | R    | Inferior Frontal Gyrus                       | 9/44  | 50              | 8   | 14 |
|          |              | 3.76                     | R    | Insula/Rolandic Operculum                    | 13/44 | 48              | 4   | 14 |
| 3.49     | R            | Insula                   | 13   | 42                                           | 12    | 8               |     |    |
| 4        | 578          | 4.33                     | L    | Postcentral Gyrus                            | 1/3   | -66             | -14 | 24 |
|          |              | 3.75                     | L    | Supramarginal Gyrus                          | 40    | -42             | -40 | 38 |
|          |              | 3.73                     | L    | Inferior Parietal Lobule                     | 40    | -56             | -36 | 50 |
|          |              | 3.72                     | L    | Inferior Parietal Lobule                     | 40    | -54             | -36 | 54 |
|          |              | 3.58                     | L    | Postcentral Gyrus                            | 2     | -56             | -24 | 48 |
|          |              | 3.55                     | L    | Postcentral Gyrus                            | 3     | -58             | -20 | 44 |
|          |              | 3.49                     | L    | Inferior Parietal Lobule/Supramarginal Gyrus | 40    | -52             | -32 | 26 |
|          |              | 3.48                     | L    | Inferior Parietal Lobule                     | 40    | -50             | -38 | 38 |
| 3.47     | L            | Inferior Parietal Lobule | 40/2 | -56                                          | -28   | 50              |     |    |

**Table S5.** Regions commonly activated during TOJ and SJ. The activated voxels were identified by inclusively masking the TOJ > rest contrast [ $P < 0.001$  uncorrected at the voxel level ( $Z = 3.09$ ) and  $P < 0.05$  FWE-corrected at the cluster level] with the SJ > rest contrast [ $P < 0.001$  uncorrected at the voxel level ( $Z = 3.09$ ) and  $P < 0.05$  FWE-corrected at the cluster level]. Note that the use of right and left hands for responding during the tasks was counterbalanced in the present study. Accordingly, brain activation of the relatively late stage for motor response processing (e.g., the left and right primary sensorimotor cortices) was cancelled out in the contrasts between the tasks and the baseline resting periods.

| Cluster# | Size (voxel) | z-score | L/R | Region                                      | BA   | MNI Coordinates |     |    |
|----------|--------------|---------|-----|---------------------------------------------|------|-----------------|-----|----|
|          |              |         |     |                                             |      | x               | y   | z  |
| 1        | 914          | 5.51    | R   | Medial Frontal Gyrus/Superior Frontal Gyrus | 6    | 10              | 6   | 60 |
|          |              | 4.81    | L   | Medial Frontal Gyrus                        | 6    | -10             | 10  | 50 |
|          |              | 4.49    | L   | Medial Frontal Gyrus                        | 6    | -8              | -2  | 60 |
|          |              | 4.04    |     | Superior Frontal Gyrus                      | 6/8  | 0               | 16  | 54 |
|          |              | 3.80    | R   | Superior Frontal Gyrus/Medial Frontal Gyrus | 6/8  | 8               | 20  | 50 |
| 2        | 2305         | 5.45    | L   | Clastrum                                    |      | -30             | 20  | 2  |
|          |              | 5.21    | L   | Caudate/Putamen                             |      | -18             | 0   | 16 |
|          |              | 5.07    | L   | Thalamus                                    |      | -12             | -12 | 2  |
|          |              | 5.05    | L   | Thalamus                                    |      | -14             | -12 | 8  |
|          |              | 5.03    | L   | Caudate                                     |      | -14             | 6   | 8  |
|          |              | 4.89    | L   | Thalamus                                    |      | -10             | -4  | 8  |
|          |              | 4.88    | L   | Thalamus                                    |      | -10             | 0   | 6  |
|          |              | 4.82    | L   | Putamen                                     |      | -26             | 2   | -2 |
|          |              | 4.73    | L   | Insula                                      | 13   | -38             | 16  | 6  |
|          |              | 4.33    | L   | Inferior Frontal Gyrus                      | 9/44 | -56             | 8   | 24 |
|          |              | 4.10    | L   | Insula                                      | 13   | -42             | -4  | 16 |
| 3        | 1190         | 3.76    | L   | Precentral Gyrus                            | 44   | -54             | 12  | 4  |
|          |              | 5.02    | R   | Insula                                      |      | 34              | 20  | 2  |
|          |              | 4.93    | R   | Thalamus                                    |      | 12              | 0   | 8  |
|          |              | 4.62    | R   | Caudate/Putamen                             |      | 18              | 2   | 14 |
|          |              | 4.54    | R   | Putamen                                     |      | 20              | 4   | 2  |
|          |              | 4.36    | R   | Putamen                                     |      | 28              | 2   | -2 |
|          |              | 3.90    | R   | Insula                                      | 13   | 42              | 16  | 6  |
|          |              | 3.78    | R   | Inferior Frontal Gyrus                      | 9/44 | 50              | 8   | 16 |
